# Supplementary material for: The composition of bacterial communities associated with plastic biofilms differs between different polymers and stages of biofilm succession
Source: PubMed Central journal article supplement (PMC6550384; doi:10.1371/journal.pone.0217165), 2019-06-05
Supplement: pone.0217165.s002.pdf [file pone.0217165.s002.pdf]

## **DNA extraction protocol**

After thawing the LDPE, HDPE and PP samples they were cut into smaller pieces and put in 2mL Eppendorf vials. The glass and PVC spheres were also put into 2 mL Eppendorf vials. Samples were incubated in 500  $\mu\text{L}$  of lysis solution (kit) and 10  $\mu\text{L}$  lysozyme ( $1000 \text{ U mL}^{-1}$ ) at  $37^\circ\text{C}$  for 30 min. Afterwards, 5  $\mu\text{L}$  proteinase k (kit) was added and mixed by inverting 25 times. About 0.325 g of beads were added per tube before bead beating two times for 45 s at a vertical speed of 4 m/s (FastPrep™, MP Biomedicals, USA). After incubating at  $55^\circ\text{C}$  for another 30 min, 4  $\mu\text{L}$  RNase (kit) was added and mixed by inverting 50 times. Following a 30 min incubation at  $37^\circ\text{C}$  and 5 min on ice, 250  $\mu\text{L}$  of protein precipitation solution (kit) was added to each tube and vortexed at high speed for 20 s. After centrifuging the tubes for 3 min at  $14,000 g$ , the supernatant was transferred to a fresh tube containing 750  $\mu\text{L}$  100% isopropanol and inverted 50 times. Following another centrifuging step at  $14,000 g$  for 5 min, the supernatant was discarded and tubes were drained from remaining isopropanol. As a washing step, 750 $\mu\text{L}$  70% ethanol was added and the tubes were inverted several times. After centrifugation for an additional 3 min, the supernatant was discarded again and tubes were drained and air-dried. The remaining DNA extract was re-suspended in 40 $\mu\text{L}$  hydration solution (kit) and incubated at  $65^\circ\text{C}$  for 45 min to completely dissolve. DNA extracts were stored frozen at  $-80^\circ\text{C}$  for later analyses.
