# Supplementary material for: The composition of bacterial communities associated with plastic biofilms differs between different polymers and stages of biofilm succession
Source: PubMed Central journal article supplement (PMC6550384; doi:10.1371/journal.pone.0217165), 2019-06-05
Supplement: pone.0217165.s004.pdf [file pone.0217165.s004.pdf]

(A)

|                   | 1 week incubation |       |       |              |               |       |      |       |
|-------------------|-------------------|-------|-------|--------------|---------------|-------|------|-------|
|                   | Dim light         |       |       |              | Ambient light |       |      |       |
|                   | diff              | lwr   | upr   | p adj        | diff          | lwr   | upr  | p adj |
| HDPE-Glass        | -0.05             | -0.82 | 0.72  | 1.00         | 0.07          | -0.69 | 0.84 | 1.00  |
| LDPE-Glass        | -0.29             | -1.06 | 0.48  | 0.96         | 0.24          | -0.53 | 1.00 | 1.00  |
| PP-Glass          | 0.24              | -0.53 | 1.00  | 1.00         | 0.00          | -0.77 | 0.77 | 1.00  |
| PVC DEHP-Glass    | -0.70             | -1.47 | 0.07  | 0.09         | -0.13         | -0.90 | 0.64 | 1.00  |
| PVC DINP-Glass    | -0.63             | -1.40 | 0.14  | 0.16         | -0.08         | -0.84 | 0.69 | 1.00  |
| SW-Glass          | -0.29             | -1.06 | 0.47  | 0.96         | 0.48          | -0.29 | 1.24 | 0.51  |
| LDPE-HDPE         | -0.24             | -1.01 | 0.53  | 0.99         | 0.16          | -0.61 | 0.93 | 1.00  |
| PP-HDPE           | 0.29              | -0.48 | 1.06  | 0.97         | -0.08         | -0.85 | 0.69 | 1.00  |
| PVC DEHP-HDPE     | -0.65             | -1.42 | 0.12  | 0.14         | -0.20         | -0.97 | 0.57 | 1.00  |
| PVC DINP-HDPE     | -0.58             | -1.35 | 0.19  | 0.25         | -0.15         | -0.92 | 0.62 | 1.00  |
| SW-HDPE           | -0.24             | -1.01 | 0.53  | 0.99         | 0.40          | -0.37 | 1.17 | 0.74  |
| PP-LDPE           | 0.53              | -0.24 | 1.30  | 0.36         | -0.24         | -1.01 | 0.53 | 0.99  |
| PVC DEHP-LDPE     | -0.41             | -1.18 | 0.36  | 0.71         | -0.36         | -1.13 | 0.40 | 0.84  |
| PVC DINP-LDPE     | -0.34             | -1.11 | 0.43  | 0.90         | -0.31         | -1.08 | 0.46 | 0.94  |
| SW-LDPE           | 0.00              | -0.77 | 0.77  | 1.00         | 0.24          | -0.53 | 1.01 | 0.99  |
| PVC DEHP-PP       | -0.94             | -1.71 | -0.17 | <b>0.01*</b> | -0.13         | -0.89 | 0.64 | 1.00  |
| PVC DINP-PP       | -0.87             | -1.64 | -0.10 | <b>0.02*</b> | -0.07         | -0.84 | 0.70 | 1.00  |
| SW-PP             | -0.53             | -1.30 | 0.24  | 0.36         | 0.48          | -0.29 | 1.25 | 0.50  |
| PVC DINP-PVC DEHP | 0.07              | -0.70 | 0.84  | 1.00         | 0.05          | -0.72 | 0.82 | 1.00  |
| SW-PVC DEHP       | 0.41              | -0.36 | 1.18  | 0.72         | 0.60          | -0.16 | 1.37 | 0.20  |
| SW-PVC DINP       | 0.34              | -0.43 | 1.11  | 0.90         | 0.55          | -0.22 | 1.32 | 0.31  |

(B)

|                   | 1 month incubation |       |       |                  |               |       |       |                  |
|-------------------|--------------------|-------|-------|------------------|---------------|-------|-------|------------------|
|                   | Dim light          |       |       |                  | Ambient light |       |       |                  |
|                   | diff               | lwr   | upr   | p adj            | diff          | lwr   | upr   | p adj            |
| HDPE-Glass        | -0.37              | -1.16 | 0.42  | 0.79             | 0.28          | -0.51 | 1.07  | 0.96             |
| LDPE-Glass        | -0.09              | -0.73 | 0.56  | 1.00             | -0.14         | -0.78 | 0.50  | 1.00             |
| PP-Glass          | 0.43               | -0.22 | 1.07  | 0.36             | 0.79          | 0.15  | 1.43  | <b>0.01*</b>     |
| PVC DEHP-Glass    | -1.48              | -2.12 | -0.84 | <b>&lt;0.01*</b> | -0.08         | -0.72 | 0.56  | 1.00             |
| PVC DINP-Glass    | -1.14              | -1.92 | -0.35 | <b>&lt;0.01*</b> | 0.39          | -0.25 | 1.03  | 0.46             |
| SW-Glass          | -1.40              | -2.04 | -0.76 | <b>&lt;0.01*</b> | -0.31         | -0.95 | 0.33  | 0.75             |
| LDPE-HDPE         | 0.28               | -0.50 | 1.07  | 0.96             | -0.42         | -1.21 | 0.37  | 0.63             |
| PP-HDPE           | 0.80               | 0.01  | 1.58  | <b>0.04*</b>     | 0.51          | -0.28 | 1.29  | 0.39             |
| PVC DEHP-HDPE     | -1.11              | -1.90 | -0.32 | <b>&lt;0.01*</b> | -0.36         | -1.15 | 0.43  | 0.82             |
| PVC DINP-HDPE     | -0.77              | -1.68 | 0.14  | 0.13             | 0.11          | -0.68 | 0.90  | 1.00             |
| SW-HDPE           | -1.03              | -1.82 | -0.25 | <b>0.01*</b>     | -0.59         | -1.38 | 0.20  | 0.22             |
| PP-LDPE           | 0.51               | -0.13 | 1.15  | 0.17             | 0.93          | 0.29  | 1.57  | <b>&lt;0.01*</b> |
| PVC DEHP-LDPE     | -1.39              | -2.04 | -0.75 | <b>&lt;0.01*</b> | 0.06          | -0.58 | 0.71  | 1.00             |
| PVC DINP-LDPE     | -1.05              | -1.84 | -0.26 | <b>0.01*</b>     | 0.53          | -0.11 | 1.18  | 0.14             |
| SW-LDPE           | -1.32              | -1.96 | -0.67 | <b>&lt;0.01*</b> | -0.17         | -0.81 | 0.47  | 1.00             |
| PVC DEHP-PP       | -1.91              | -2.55 | -1.26 | <b>&lt;0.01*</b> | -0.87         | -1.51 | -0.22 | <b>0.01*</b>     |
| PVC DINP-PP       | -1.56              | -2.35 | -0.78 | <b>&lt;0.01*</b> | -0.40         | -1.04 | 0.25  | 0.45             |
| SW-PP             | -1.83              | -2.47 | -1.19 | <b>&lt;0.01*</b> | -1.10         | -1.74 | -0.46 | <b>&lt;0.01*</b> |
| PVC DINP-PVC DEHP | 0.34               | -0.44 | 1.13  | 0.86             | 0.47          | -0.17 | 1.11  | 0.25             |
| SW-PVC DEHP       | 0.08               | -0.56 | 0.72  | 1.00             | -0.23         | -0.88 | 0.41  | 0.96             |
| SW-PVC DINP       | -0.26              | -1.05 | 0.52  | 0.98             | -0.70         | -1.35 | -0.06 | 0.03             |

(C)

|                   | 2 months incubation |       |       |              |               |       |      |       |
|-------------------|---------------------|-------|-------|--------------|---------------|-------|------|-------|
|                   | Dim light           |       |       |              | Ambient light |       |      |       |
|                   | diff                | lwr   | upr   | p adj        | diff          | lwr   | upr  | p adj |
| HDPE-Glass        | 0.74                | -0.98 | 2.45  | 0.86         | -0.52         | -2.24 | 1.19 | 0.99  |
| LDPE-Glass        | 0.66                | -1.44 | 2.76  | 0.99         | -0.40         | -2.11 | 1.31 | 1.00  |
| PP-Glass          | -0.01               | -1.72 | 1.71  | 1.00         | -0.17         | -1.88 | 1.54 | 1.00  |
| PVC DEHP-Glass    | -1.11               | -2.82 | 0.61  | 0.39         | -0.70         | -2.42 | 1.01 | 0.90  |
| PVC DINP-Glass    | -0.60               | -2.70 | 1.50  | 0.99         | -0.65         | -2.36 | 1.07 | 0.94  |
| SW-Glass          | -1.16               | -3.26 | 0.94  | 0.59         | -0.64         | -2.74 | 1.46 | 0.99  |
| LDPE-HDPE         | -0.08               | -2.18 | 2.02  | 1.00         | 0.12          | -1.59 | 1.84 | 1.00  |
| PP-HDPE           | -0.74               | -2.46 | 0.97  | 0.86         | 0.36          | -1.36 | 2.07 | 1.00  |
| PVC DEHP-HDPE     | -1.84               | -3.56 | -0.13 | <b>0.03*</b> | -0.18         | -1.89 | 1.53 | 1.00  |
| PVC DINP-HDPE     | -1.34               | -3.44 | 0.76  | 0.40         | -0.12         | -1.84 | 1.59 | 1.00  |
| SW-HDPE           | -1.90               | -4.00 | 0.20  | 0.09         | -0.12         | -2.22 | 1.98 | 1.00  |
| PP-LDPE           | -0.66               | -2.76 | 1.44  | 0.99         | 0.23          | -1.48 | 1.95 | 1.00  |
| PVC DEHP-LDPE     | -1.76               | -3.86 | 0.34  | 0.13         | -0.30         | -2.02 | 1.41 | 1.00  |
| PVC DINP-LDPE     | -1.26               | -3.69 | 1.16  | 0.67         | -0.25         | -1.96 | 1.47 | 1.00  |
| SW-LDPE           | -1.82               | -4.24 | 0.60  | 0.22         | -0.24         | -2.34 | 1.86 | 1.00  |
| PVC DEHP-PP       | -1.10               | -2.81 | 0.61  | 0.40         | -0.53         | -2.25 | 1.18 | 0.99  |
| PVC DINP-PP       | -0.60               | -2.70 | 1.50  | 0.99         | -0.48         | -2.19 | 1.24 | 1.00  |
| SW-PP             | -1.16               | -3.25 | 0.94  | 0.60         | -0.47         | -2.57 | 1.63 | 1.00  |
| PVC DINP-PVC DEHP | 0.50                | -1.60 | 2.60  | 1.00         | 0.06          | -1.66 | 1.77 | 1.00  |
| SW-PVC DEHP       | -0.06               | -2.15 | 2.04  | 1.00         | 0.06          | -2.04 | 2.16 | 1.00  |
| SW-PVC DINP       | -0.56               | -2.98 | 1.87  | 1.00         | 0.01          | -2.09 | 2.11 | 1.00  |
