# Supplementary material for: The composition of bacterial communities associated with plastic biofilms differs between different polymers and stages of biofilm succession
Source: PubMed Central journal article supplement (PMC6550384; doi:10.1371/journal.pone.0217165), 2019-06-05
Supplement: pone.0217165.s005.pdf [file pone.0217165.s005.pdf]

(A)

|                   | 1 week incubation |       |       |                  |               |       |      |                  |
|-------------------|-------------------|-------|-------|------------------|---------------|-------|------|------------------|
|                   | Dim light         |       |       |                  | Ambient light |       |      |                  |
|                   | diff              | lwr   | upr   | p adj            | diff          | lwr   | upr  | p adj            |
| HDPE-Glass        | -0.11             | -0.24 | 0.03  | 0.17             | 0.04          | -0.10 | 0.17 | 1.00             |
| LDPE-Glass        | -0.17             | -0.30 | -0.04 | <b>0.01*</b>     | 0.08          | -0.06 | 0.21 | 0.62             |
| PP-Glass          | 0.07              | -0.06 | 0.21  | 0.69             | 0.00          | -0.13 | 0.14 | 1.00             |
| PVC DEHP-Glass    | -0.35             | -0.48 | -0.21 | <b>&lt;0.01*</b> | -0.01         | -0.15 | 0.12 | 1.00             |
| PVC DINP-Glass    | -0.30             | -0.44 | -0.17 | <b>&lt;0.01*</b> | -0.01         | -0.14 | 0.13 | 1.00             |
| SW-Glass          | -0.09             | -0.22 | 0.04  | 0.40             | 0.29          | 0.15  | 0.42 | <b>&lt;0.01*</b> |
| LDPE-HDPE         | -0.06             | -0.20 | 0.07  | 0.87             | 0.04          | -0.10 | 0.17 | 1.00             |
| PP-HDPE           | 0.18              | 0.05  | 0.32  | <b>&lt;0.01*</b> | -0.04         | -0.17 | 0.10 | 1.00             |
| PVC DEHP-HDPE     | -0.24             | -0.37 | -0.10 | <b>&lt;0.01*</b> | -0.05         | -0.19 | 0.08 | 0.95             |
| PVC DINP-HDPE     | -0.20             | -0.33 | -0.06 | <b>&lt;0.01*</b> | -0.04         | -0.18 | 0.09 | 0.99             |
| SW-HDPE           | 0.02              | -0.12 | 0.15  | 1.00             | 0.25          | 0.11  | 0.38 | <b>&lt;0.01*</b> |
| PP-LDPE           | 0.24              | 0.11  | 0.38  | <b>&lt;0.01*</b> | -0.08         | -0.21 | 0.06 | 0.63             |
| PVC DEHP-LDPE     | -0.18             | -0.31 | -0.04 | <b>0.01*</b>     | -0.09         | -0.23 | 0.04 | 0.38             |
| PVC DINP-LDPE     | -0.13             | -0.27 | 0.00  | 0.05             | -0.08         | -0.22 | 0.05 | 0.53             |
| SW-LDPE           | 0.08              | -0.05 | 0.21  | 0.56             | 0.21          | 0.08  | 0.34 | <b>&lt;0.01*</b> |
| PVC DEHP-PP       | -0.42             | -0.55 | -0.28 | <b>&lt;0.01*</b> | -0.02         | -0.15 | 0.12 | 1.00             |
| PVC DINP-PP       | -0.38             | -0.51 | -0.24 | <b>&lt;0.01*</b> | -0.01         | -0.14 | 0.13 | 1.00             |
| SW-PP             | -0.16             | -0.30 | -0.03 | <b>0.01</b>      | 0.29          | 0.15  | 0.42 | <b>&lt;0.01*</b> |
| PVC DINP-PVC DEHP | 0.04              | -0.09 | 0.18  | 0.99             | 0.01          | -0.13 | 0.14 | 1.00             |
| SW-PVC DEHP       | 0.26              | 0.12  | 0.39  | <b>&lt;0.01*</b> | 0.30          | 0.17  | 0.44 | <b>&lt;0.01*</b> |
| SW-PVC DINP       | 0.21              | 0.08  | 0.35  | 9.41             | 0.29          | 0.16  | 0.43 | <b>&lt;0.01*</b> |

(B)

|                   | 1 month incubation |       |       |                  |               |       |      |       |
|-------------------|--------------------|-------|-------|------------------|---------------|-------|------|-------|
|                   | Dim light          |       |       |                  | Ambient light |       |      |       |
|                   | diff               | lwr   | upr   | p adj            | diff          | lwr   | upr  | p adj |
| HDPE-Glass        | -0.45              | -1.31 | 0.41  | 0.66             | 0.18          | -0.68 | 1.04 | 1.00  |
| LDPE-Glass        | -0.37              | -1.07 | 0.34  | 0.67             | -0.03         | -0.73 | 0.67 | 1.00  |
| PP-Glass          | 0.06               | -0.64 | 0.76  | 1.00             | 0.43          | -0.27 | 1.13 | 0.46  |
| PVC DEHP-Glass    | -1.04              | -1.74 | -0.34 | <b>&lt;0.01*</b> | -0.04         | -0.74 | 0.66 | 1.00  |
| PVC DINP-Glass    | -0.99              | -1.85 | -0.13 | <b>0.02*</b>     | 0.31          | -0.40 | 1.01 | 0.85  |
| SW-Glass          | -0.94              | -1.64 | -0.24 | <b>0.01*</b>     | -0.02         | -0.73 | 0.68 | 1.00  |
| LDPE-HDPE         | 0.08               | -0.78 | 0.94  | 1.00             | -0.21         | -1.07 | 0.65 | 1.00  |
| PP-HDPE           | 0.51               | -0.35 | 1.37  | 0.50             | 0.25          | -0.61 | 1.11 | 0.99  |
| PVC DEHP-HDPE     | -0.59              | -1.45 | 0.27  | 0.32             | -0.22         | -1.08 | 0.64 | 1.00  |
| PVC DINP-HDPE     | -0.54              | -1.53 | 0.45  | 0.61             | 0.13          | -0.73 | 0.99 | 1.00  |
| SW-HDPE           | -0.49              | -1.35 | 0.37  | 0.55             | -0.20         | -1.06 | 0.66 | 1.00  |
| PP-LDPE           | 0.43               | -0.28 | 1.13  | 0.47             | 0.46          | -0.24 | 1.16 | 0.37  |
| PVC DEHP-LDPE     | -0.67              | -1.37 | 0.03  | 0.06             | -0.01         | -0.71 | 0.69 | 1.00  |
| PVC DINP-LDPE     | -0.63              | -1.49 | 0.23  | 0.25             | 0.34          | -0.36 | 1.04 | 0.76  |
| SW-LDPE           | -0.58              | -1.28 | 0.13  | 0.15             | 0.01          | -0.69 | 0.71 | 1.00  |
| PVC DEHP-PP       | -1.10              | -1.80 | -0.40 | <b>&lt;0.01*</b> | -0.47         | -1.17 | 0.23 | 0.35  |
| PVC DINP-PP       | -1.05              | -1.91 | -0.19 | <b>0.01*</b>     | -0.12         | -0.82 | 0.58 | 1.00  |
| SW-PP             | -1.00              | -1.70 | -0.30 | <b>&lt;0.01*</b> | -0.45         | -1.15 | 0.25 | 0.39  |
| PVC DINP-PVC DEHP | 0.05               | -0.81 | 0.91  | 1.00             | 0.35          | -0.35 | 1.05 | 0.73  |
| SW-PVC DEHP       | 0.10               | -0.61 | 0.80  | 1.00             | 0.02          | -0.68 | 0.72 | 1.00  |
| SW-PVC DINP       | 0.05               | -0.81 | 0.91  | 1.00             | -0.33         | -1.03 | 0.37 | 0.78  |

(C)

|                   | 2 months incubation |       |       |                  |               |       |      |       |
|-------------------|---------------------|-------|-------|------------------|---------------|-------|------|-------|
|                   | Dim light           |       |       |                  | Ambient light |       |      |       |
|                   | diff                | lwr   | upr   | p adj            | diff          | lwr   | upr  | p adj |
| HDPE-Glass        | 0.45                | -0.50 | 1.39  | 0.78             | -0.20         | -1.14 | 0.74 | 1.00  |
| LDPE-Glass        | 0.43                | -0.72 | 1.59  | 0.94             | -0.10         | -1.04 | 0.84 | 1.00  |
| PP-Glass          | -0.10               | -1.04 | 0.84  | 1.00             | -0.20         | -1.14 | 0.75 | 1.00  |
| PVC DEHP-Glass    | -0.89               | -1.84 | 0.05  | 0.07             | -0.23         | -1.17 | 0.72 | 1.00  |
| PVC DINP-Glass    | -0.72               | -1.88 | 0.43  | 0.43             | -0.19         | -1.13 | 0.76 | 1.00  |
| SW-Glass          | -0.80               | -1.96 | 0.36  | 0.31             | -0.12         | -1.27 | 1.04 | 1.00  |
| LDPE-HDPE         | -0.02               | -1.17 | 1.14  | 1.00             | 0.10          | -0.84 | 1.04 | 1.00  |
| PP-HDPE           | -0.55               | -1.49 | 0.40  | 0.53             | 0.00          | -0.94 | 0.95 | 1.00  |
| PVC DEHP-HDPE     | -1.34               | -2.28 | -0.40 | <b>&lt;0.01*</b> | -0.03         | -0.97 | 0.92 | 1.00  |
| PVC DINP-HDPE     | -1.17               | -2.33 | -0.01 | <b>0.05*</b>     | 0.01          | -0.93 | 0.96 | 1.00  |
| SW-HDPE           | -1.25               | -2.40 | -0.09 | <b>0.03*</b>     | 0.09          | -1.07 | 1.24 | 1.00  |
| PP-LDPE           | -0.53               | -1.69 | 0.62  | 0.81             | -0.10         | -1.04 | 0.85 | 1.00  |
| PVC DEHP-LDPE     | -1.32               | -2.48 | -0.17 | <b>0.02*</b>     | -0.13         | -1.07 | 0.82 | 1.00  |
| PVC DINP-LDPE     | -1.15               | -2.49 | 0.18  | 0.11             | -0.09         | -1.03 | 0.86 | 1.00  |
| SW-LDPE           | -1.23               | -2.57 | 0.10  | 0.08             | -0.01         | -1.17 | 1.14 | 1.00  |
| PVC DEHP-PP       | -0.79               | -1.74 | 0.15  | 0.13             | -0.03         | -0.97 | 0.92 | 1.00  |
| PVC DINP-PP       | -0.62               | -1.78 | 0.53  | 0.63             | 0.01          | -0.93 | 0.95 | 1.00  |
| SW-PP             | -0.70               | -1.86 | 0.46  | 0.47             | 0.08          | -1.07 | 1.24 | 1.00  |
| PVC DINP-PVC DEHP | 0.17                | -0.99 | 1.33  | 1.00             | 0.04          | -0.91 | 0.98 | 1.00  |
| SW-PVC DEHP       | 0.09                | -1.06 | 1.25  | 1.00             | 0.11          | -1.04 | 1.27 | 1.00  |
| SW-PVC DINP       | -0.08               | -1.41 | 1.26  | 1.00             | 0.07          | -1.08 | 1.23 | 1.00  |
