# Supplementary material for: The composition of bacterial communities associated with plastic biofilms differs between different polymers and stages of biofilm succession
Source: PubMed Central journal article supplement (PMC6550384; doi:10.1371/journal.pone.0217165), 2019-06-05
Supplement: pone.0217165.s006.pdf [file pone.0217165.s006.pdf]

(A)

|                   | 1 week incubation |       |      |       |               |       |      |       |
|-------------------|-------------------|-------|------|-------|---------------|-------|------|-------|
|                   | Dim light         |       |      |       | Ambient light |       |      |       |
|                   | diff              | lwr   | upr  | p adj | diff          | lwr   | upr  | p adj |
| HDPE-Glass        | -32.5             | -188  | 123  | 1.00  | -31.8         | -187  | 124  | 1.00  |
| LDPE-Glass        | -20.4             | -17   | 135  | 1.00  | -29.9         | -185  | 125  | 1.00  |
| PP-Glass          | -24.3             | -180  | 131  | 1.00  | -25.9         | -181  | 129  | 1.00  |
| PVC DEHP-Glass    | -120              | -276  | 35.4 | 0.22  | -107          | -263  | 48.7 | 0.36  |
| PVC DINP-Glass    | -105              | -261  | 50.7 | 0.39  | -83.3         | -239  | 72.5 | 0.71  |
| SW-Glass          | -40.2             | -196  | 115  | 1.00  | 24.3          | -131  | 180  | 1.00  |
| LDPE-HDPE         | 12.1              | -143  | 168  | 1.00  | 1.98          | -153  | 157  | 1.00  |
| PP-HDPE           | 8.21              | -147  | 164  | 1.00  | 5.97          | -149  | 161  | 1.00  |
| PVC DEHP-HDPE     | -87.8             | -243  | 68   | 0.64  | -75.2         | -231  | 80.6 | 0.82  |
| PVC DINP-HDPE     | -72.6             | -228  | 83.2 | 0.86  | -51.4         | -207  | 104  | 0.99  |
| SW-HDPE           | -7.69             | -163  | 148  | 1.00  | 56.2          | -99.6 | 212  | 0.98  |
| PP-LDPE           | -3.91             | -159  | 151  | 1.00  | 3.99          | -151  | 159  | 1.00  |
| PVC DEHP-LDPE     | -100              | -255  | 55.8 | 0.46  | -77.2         | -233  | 78.6 | 0.80  |
| PVC DINP-LDPE     | -84.7             | -240  | 71.1 | 0.69  | -53.4         | -209  | 102  | 0.99  |
| SW-LDPE           | -19.8             | -175  | 136  | 1.00  | 54.2          | -101  | 210  | 0.98  |
| PVC DEHP-PP       | -96.1             | -251  | 59.7 | 0.52  | -81.2         | -237  | 74.6 | 0.74  |
| PVC DINP-PP       | -80.8             | -236  | 75.0 | 0.75  | -57.4         | -213  | 98.4 | 0.97  |
| SW-PP             | -15.8             | -171  | 140  | 1.00  | 50.2          | -105  | 206  | 0.99  |
| PVC DINP-PVC DEHP | 15.2              | -140  | 171  | 1.00  | 23.8          | -132  | 179  | 1.00  |
| SW-PVC DEHP       | 80.2              | -75.6 | 236  | 0.76  | 131           | -24.3 | 287  | 0.14  |
| SW-PVC DINP       | 64.9              | -90.9 | 220  | 0.93  | 107           | -48.2 | 263  | 0.36  |

(B)

|                   | 1 month incubation |       |       |                  |               |       |        |                  |
|-------------------|--------------------|-------|-------|------------------|---------------|-------|--------|------------------|
|                   | Dim light          |       |       |                  | Ambient light |       |        |                  |
|                   | diff               | lwr   | Upr   | p adj            | diff          | lwr   | upr    | p adj            |
| HDPE-Glass        | 28.3               | -194  | 251   | 1.00             | -40.9         | -263  | 181.68 | 1.00             |
| LDPE-Glass        | 51.2               | -130  | 233   | 1.00             | -135          | -317  | 46.18  | 0.23             |
| PP-Glass          | 54.7               | -127  | 236   | 0.99             | 44.5          | -137  | 226.36 | 1.00             |
| PVC DEHP-Glass    | -318               | -500  | -136  | <b>&lt;0.01*</b> | -114          | -296  | 67.34  | 0.42             |
| PVC DINP-Glass    | -191               | -413  | 31.6  | 0.12             | -75.4         | -257  | 106.40 | 0.89             |
| SW-Glass          | -356               | -538  | -175  | <b>&lt;0.01*</b> | -264          | -446  | -82.52 | <b>&lt;0.01*</b> |
| LDPE-HDPE         | 22.8               | -199  | 245   | 1.00             | -94.6         | -317  | 128.03 | 0.87             |
| PP-HDPE           | 26.4               | -196  | 249   | 1.00             | 85.5          | -137  | 308.22 | 0.93             |
| PVC DEHP-HDPE     | -346               | -569  | -124  | <b>&lt;0.01*</b> | -73.4         | -296  | 149.19 | 0.98             |
| PVC DINP-HDPE     | -219               | -476  | 37.7  | 0.12             | -34.4         | -257  | 188.25 | 1.00             |
| SW-HDPE           | -385               | -608  | -162  | <b>&lt;0.01*</b> | -223          | -446  | -0.67  | <b>0.05</b>      |
| PP-LDPE           | 3.57               | -178  | 185   | 1.00             | 180           | -1.63 | 361.99 | 0.05             |
| PVC DEHP-LDPE     | -369               | -551  | -187  | <b>&lt;0.01*</b> | 21.1          | -160  | 202.97 | 1.00             |
| PVC DINP-LDPE     | -242               | -464  | -19.5 | <b>0.03</b>      | 60.2          | -121  | 242.03 | 0.98             |
| SW-LDPE           | -408               | -590  | -226  | <b>&lt;0.01*</b> | -128          | -310  | 53.11  | 0.28             |
| PVC DEHP-PP       | -373               | -555  | -191  | <b>&lt;0.01*</b> | -159          | -340  | 22.79  | 0.11             |
| PVC DINP-PP       | -245               | -468  | -23.1 | <b>0.03</b>      | -119          | -301  | 61.85  | 0.36             |
| SW-PP             | -411               | -593  | -229  | <b>&lt;0.01*</b> | -308          | -490  | -127.0 | <b>&lt;0.01*</b> |
| PVC DINP-PVC DEHP | 127                | -95.2 | 350   | 0.55             | 39.0          | -142  | 220.87 | 1.00             |
| SW-PVC DEHP       | -38.5              | -220  | 143   | 1.00             | -149          | -331  | 31.96  | 0.14             |
| SW-PVC DINP       | -165               | -388  | 56.6  | 0.23             | -188          | -370  | -7.11  | <b>0.04</b>      |

(C)

|                   | 2 months incubation |       |       |              |               |      |     |       |
|-------------------|---------------------|-------|-------|--------------|---------------|------|-----|-------|
|                   | Dim light           |       |       |              | Ambient light |      |     |       |
|                   | diff                | lwr   | upr   | p adj        | diff          | lwr  | upr | p adj |
| HDPE-Glass        | 113                 | -77.7 | 304   | 0.23         | -125          | -481 | 230 | 0.75  |
| LDPE-Glass        | 63.1                | -170  | 296   | 0.81         | -102          | -458 | 253 | 0.87  |
| PP-Glass          | 41.9                | -148  | 232   | 0.90         | 0.84          | -355 | 356 | 1.00  |
| PVC DEHP-Glass    | -157                | -348  | 32.9  | 0.09         | -175          | -531 | 180 | 0.47  |
| PVC DINP-Glass    | -46.8               | -280  | 186   | 0.93         | -170          | -526 | 185 | 0.50  |
| SW-Glass          | -226                | -460  | 7.04  | 0.06         | -258          | -694 | 177 | 0.31  |
| LDPE-HDPE         | -50.0               | -283  | 183   | 0.91         | 23.2          | -332 | 379 | 1.00  |
| PP-HDPE           | -71.1               | -262  | 119   | 0.58         | 126           | -229 | 482 | 0.75  |
| PVC DEHP-HDPE     | -271                | -462  | -80.2 | <b>0.01*</b> | -50.00        | -405 | 305 | 0.99  |
| PVC DINP-HDPE     | -160                | -393  | 73.7  | 0.16         | -44.2         | -400 | 311 | 1.00  |
| SW-HDPE           | -339                | -573  | -106  | <b>0.01*</b> | -132          | -568 | 303 | 0.84  |
| PP-LDPE           | -21.1               | -254  | 212   | 1.00         | 103           | -252 | 459 | 0.87  |
| PVC DEHP-LDPE     | -221                | -454  | 12.7  | 0.06         | -73.2         | -429 | 282 | 0.97  |
| PVC DINP-LDPE     | -110                | -379  | 159   | 0.51         | -67.4         | -423 | 288 | 0.98  |
| SW-LDPE           | -289                | -559  | -19.9 | <b>0.04*</b> | -155          | -591 | 280 | 0.74  |
| PVC DEHP-PP       | -199                | -390  | -9.02 | <b>0.04*</b> | -176          | -532 | 179 | 0.46  |
| PVC DINP-PP       | -88.8               | -322  | 144   | 0.56         | -171          | -526 | 184 | 0.49  |
| SW-PP             | -268                | -502  | -34.9 | <b>0.03*</b> | -259          | -695 | 176 | 0.30  |
| PVC DINP-PVC DEHP | 111                 | -122  | 344   | 0.38         | 5.78          | -350 | 361 | 1.00  |
| SW-PVC DEHP       | -68.7               | -302  | 165   | 0.75         | -82.7         | -518 | 353 | 0.98  |
| SW-PVC DINP       | -179                | -449  | 90.1  | 0.17         | -88.5         | -524 | 347 | 0.97  |
