# Supplementary material for: The composition of bacterial communities associated with plastic biofilms differs between different polymers and stages of biofilm succession
Source: PubMed Central journal article supplement (PMC6550384; doi:10.1371/journal.pone.0217165), 2019-06-05

A

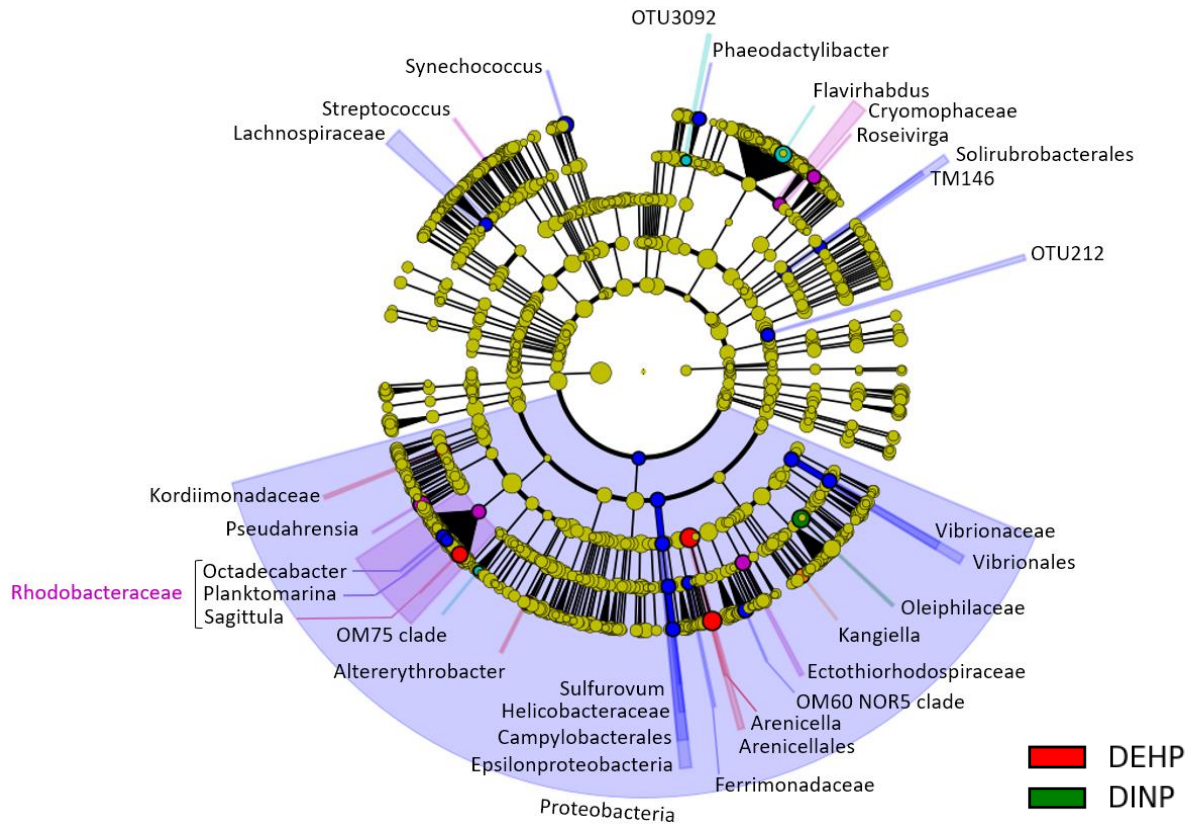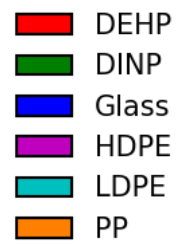

B

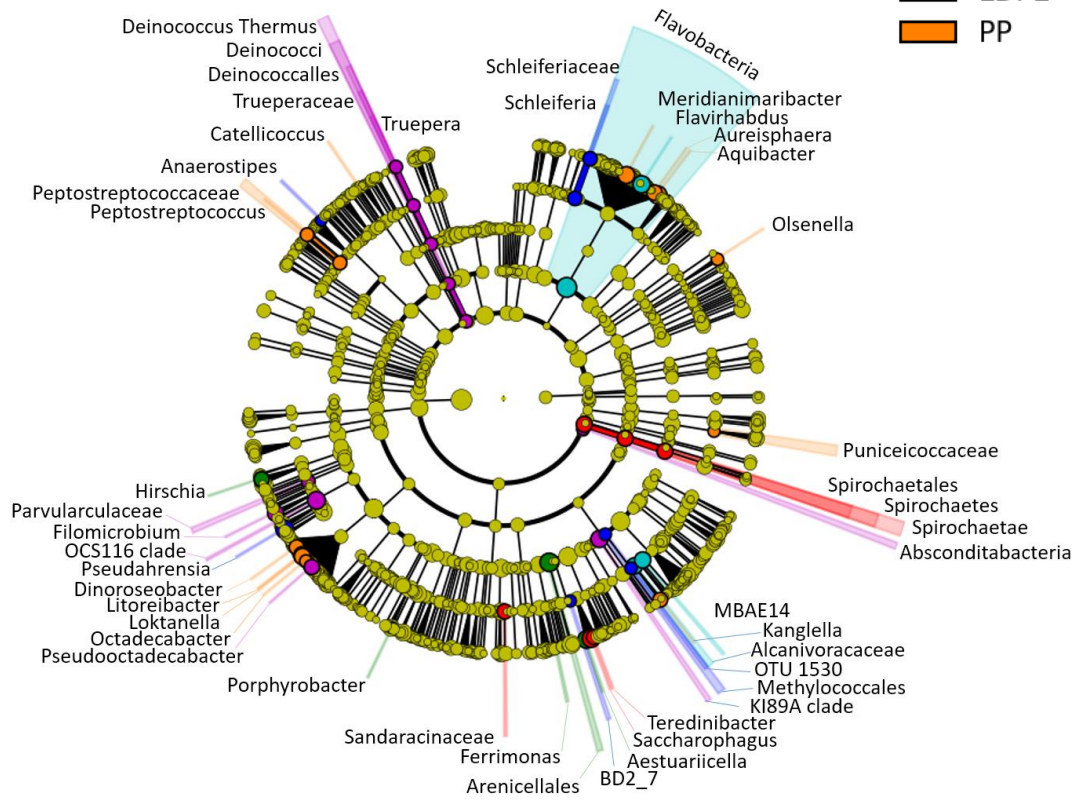

Supplement: pone.0217165.s008.pdf [file pone.0217165.s008.pdf]
