# Supplementary material for: The composition of bacterial communities associated with plastic biofilms differs between different polymers and stages of biofilm succession
Source: PubMed Central journal article supplement (PMC6550384; doi:10.1371/journal.pone.0217165), 2019-06-05
Supplement: pone.0217165.s009.pdf [file pone.0217165.s009.pdf]

|                       | OTU richness |                         | Shannon diversity |                         | Simpson diversity |                         |
|-----------------------|--------------|-------------------------|-------------------|-------------------------|-------------------|-------------------------|
|                       | F value      | Pr(>F)                  | F value           | Pr(>F)                  | F value           | Pr(>F)                  |
| Type                  | 24.7         | 6.8 x10 <sup>-11*</sup> | 20.6              | 6.9 x10 <sup>-10*</sup> | 18                | 3.6 x10 <sup>-9*</sup>  |
| Month                 | 110          | 2.3 x10 <sup>-15*</sup> | 96.3              | 2.6 x10 <sup>-11*</sup> | 130               | 3.5 x10 <sup>-13*</sup> |
| Exposure              | 30.4         | 4.1 x10 <sup>-06*</sup> | 67.2              | 2.3 x10 <sup>-12*</sup> | 55                | 3.3 x10 <sup>-11*</sup> |
| Type: Month           | 4.0          | 7.0 x10 <sup>-04*</sup> | 8.6               | 2.6 x10 <sup>-05*</sup> | 15                | 1.4 x10 <sup>-7*</sup>  |
| Type: Exposure        | 5.6          | 7.8 x10 <sup>-04*</sup> | 3.5               | 2.3 x10 <sup>-03*</sup> | 4.9               | 1.2 x10 <sup>-4*</sup>  |
| Month: Treatment      | 0.5          | 0.61                    | 3.2               | 5.2 x10 <sup>-02</sup>  | 16                | 1.5 x10 <sup>-5*</sup>  |
| Type: Month: Exposure | 2.5          | 0.025*                  | 3.4               | 3.9 x10 <sup>-03*</sup> | 4.4               | 6.2 x10 <sup>-4*</sup>  |
