# Supplementary material for: The composition of bacterial communities associated with plastic biofilms differs between different polymers and stages of biofilm succession
Source: PubMed Central journal article supplement (PMC6550384; doi:10.1371/journal.pone.0217165), 2019-06-05
Supplement: pone.0217165.s010.pdf [file pone.0217165.s010.pdf]

|                    |                       | Df | SumsOfSqs | MeanSqs | F.Model | R2    | Pr(>F) |
|--------------------|-----------------------|----|-----------|---------|---------|-------|--------|
| With autotrophs    | Type                  | 6  | 5.12      | 0.85    | 16.1    | 0.24  | 0.001* |
|                    | Exposure              | 1  | 2.08      | 2.08    | 39.3    | 0.09  | 0.001* |
|                    | Month                 | 2  | 5.08      | 2.54    | 48.1    | 0.24  | 0.001* |
|                    | Type: Exposure        | 5  | 1.28      | 0.26    | 4.83    | 0.06  | 0.001* |
|                    | Type: Month           | 12 | 3.02      | 0.25    | 4.76    | 0.14  | 0.001* |
|                    | Exposure: Month       | 2  | 1.25      | 0.62    | 11.8    | 0.06  | 0.001* |
|                    | Type: Exposure: Month | 10 | 1.68      | 0.17    | 3.18    | 0.08  | 0.001* |
|                    | Residuals             | 35 | 1.85      | 0.05    |         | 0.09  |        |
|                    | Total                 | 73 | 21.4      |         |         | 1     |        |
| Without autotrophs | Type                  | 6  | 5.34      | 0.89    | 17.6    | 0.25  | 0.001* |
|                    | Exposure              | 1  | 1.09      | 1.09    | 21.7    | 0.051 | 0.001* |
|                    | Month                 | 2  | 5.75      | 2.88    | 56.8    | 0.27  | 0.001* |
|                    | Type: Exposure        | 5  | 1.09      | 0.22    | 4.34    | 0.05  | 0.001* |
|                    | Type: Month           | 12 | 3.36      | 0.28    | 5.54    | 0.16  | 0.001* |
|                    | Exposure: Month       | 2  | 1.15      | 0.57    | 11.3    | 0.05  | 0.001* |
|                    | Type: Exposure: Month | 10 | 1.59      | 0.16    | 3.16    | 0.08  | 0.001* |
|                    | Residuals             | 35 | 1.77      | 0.05    |         | 0.08  |        |
|                    | Total                 | 73 | 21.2      |         |         | 1     |        |
