# Supplementary material for: The composition of bacterial communities associated with plastic biofilms differs between different polymers and stages of biofilm succession
Source: PubMed Central journal article supplement (PMC6550384; doi:10.1371/journal.pone.0217165), 2019-06-05
Supplement: pone.0217165.s011.pdf [file pone.0217165.s011.pdf]

|                       |                | Df | SumsOfSqs | MeanSqs | F.Model | R2      | Pr(>F) |
|-----------------------|----------------|----|-----------|---------|---------|---------|--------|
| <b>After 1 week</b>   | Type           | 5  | 2.5575    | 0.51149 | 4.5796  | 0.34348 | 0.001* |
|                       | Exposure       | 1  | 1.5434    | 1.54342 | 13.819  | 0.20729 | 0.001* |
|                       | Type: Exposure | 5  | 2.0046    | 0.40092 | 3.5896  | 0.26923 | 0.001* |
|                       | Residuals      | 12 | 1.3403    | 0.11169 |         | 0.18    |        |
|                       | Total          | 23 | 7.4457    |         |         | 1       |        |
| <b>After 1 month</b>  | Type           | 5  | 1.7524    | 0.35047 | 3.023   | 0.32959 | 0.001* |
|                       | Exposure       | 1  | 0.9785    | 0.9785  | 8.4402  | 0.18404 | 0.001* |
|                       | Type: Exposure | 5  | 1.3106    | 0.26212 | 2.261   | 0.24651 | 0.001* |
|                       | Residuals      | 11 | 1.2753    | 0.11593 |         | 0.23986 |        |
|                       | Total          | 22 | 5.3167    |         |         | 1       |        |
| <b>After 2 months</b> | Type           | 5  | 2.0168    | 0.40336 | 3.0467  | 0.33781 | 0.001* |
|                       | Exposure       | 1  | 1.3456    | 1.34555 | 10.1635 | 0.22538 | 0.001* |
|                       | Type: Exposure | 5  | 1.284     | 0.2568  | 1.9397  | 0.21507 | 0.003* |
|                       | Residuals      | 10 | 1.3239    | 0.13239 |         | 0.22175 |        |
|                       | Total          | 21 | 5.9703    |         |         | 1       |        |

\* indicates significant differences ( $p < 0.05$ ).
