# Supplementary material for: The composition of bacterial communities associated with plastic biofilms differs between different polymers and stages of biofilm succession
Source: PubMed Central journal article supplement (PMC6550384; doi:10.1371/journal.pone.0217165), 2019-06-05
Supplement: pone.0217165.s012.pdf [file pone.0217165.s012.pdf]

|                       |                | Df | SumsOfSqs | MeanSqs | F.Model | R2      | Pr(>F) |
|-----------------------|----------------|----|-----------|---------|---------|---------|--------|
| <b>After 1 week</b>   | Type           | 5  | 2.193     | 0.43861 | 8.9118  | 0.38689 | 0.001* |
|                       | Exposure       | 1  | 1.4278    | 1.42779 | 29.0102 | 0.25189 | 0.001* |
|                       | Type: Exposure | 5  | 1.4569    | 0.29139 | 5.9205  | 0.25703 | 0.001* |
|                       | Residuals      | 12 | 0.5906    | 0.04922 |         | 0.10419 |        |
|                       | Total          | 23 | 5.6684    |         |         | 1       |        |
| <b>After 1 month</b>  | Type           | 5  | 1.2345    | 0.24689 | 4.613   | 0.37296 | 0.001* |
|                       | Exposure       | 1  | 0.712     | 0.71205 | 13.3043 | 0.21513 | 0.001* |
|                       | Type: Exposure | 5  | 0.7747    | 0.15493 | 2.8949  | 0.23405 | 0.001* |
|                       | Residuals      | 11 | 0.5887    | 0.05352 |         | 0.17787 |        |
|                       | Total          | 22 | 3.3099    |         |         | 1       |        |
| <b>After 2 months</b> | Type           | 5  | 1.6556    | 0.33113 | 5.1858  | 0.39508 | 0.001* |
|                       | Exposure       | 1  | 1.1561    | 1.15607 | 18.1051 | 0.27587 | 0.001* |
|                       | Type: Exposure | 5  | 0.7404    | 0.14809 | 2.3192  | 0.17669 | 0.007* |
|                       | Residuals      | 10 | 0.6385    | 0.06385 |         | 0.15237 |        |
|                       | Total          | 21 | 4.1907    |         |         | 1       |        |

\* indicates significant differences ( $p < 0.05$ ).
