# Supplementary material for: The composition of bacterial communities associated with plastic biofilms differs between different polymers and stages of biofilm succession
Source: PubMed Central journal article supplement (PMC6550384; doi:10.1371/journal.pone.0217165), 2019-06-05
Supplement: pone.0217165.s020.pdf [file pone.0217165.s020.pdf]

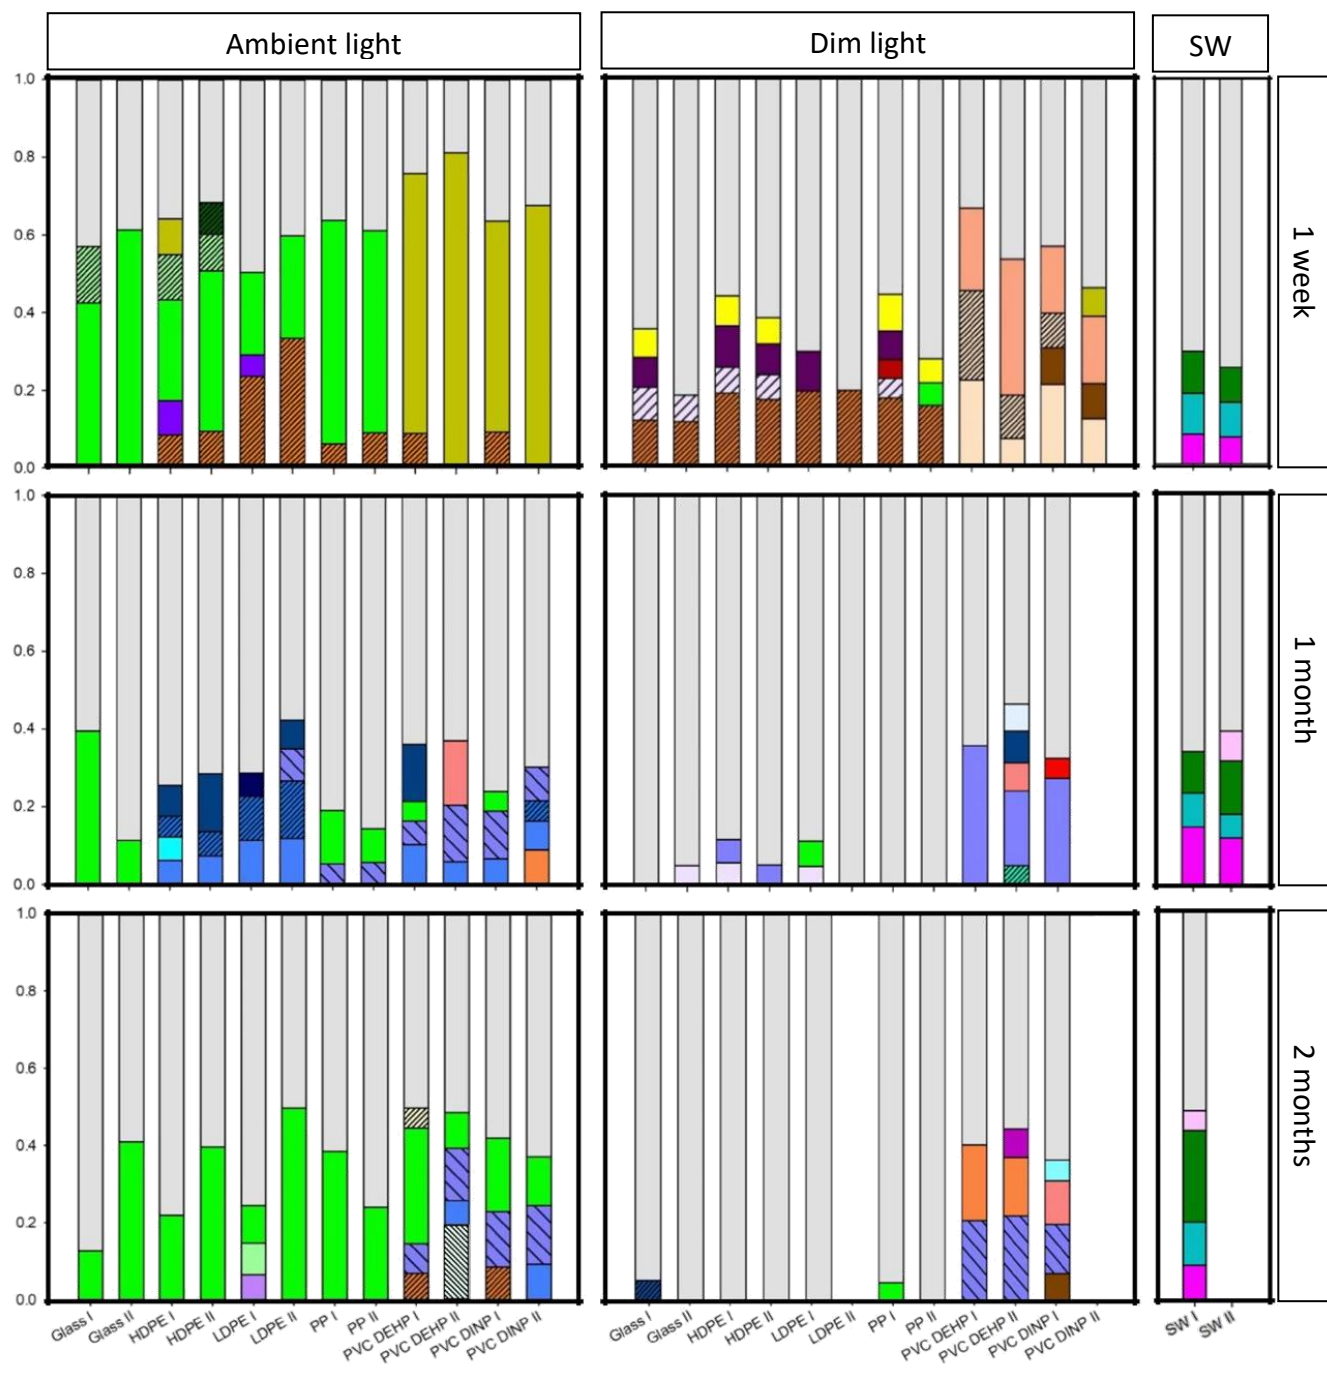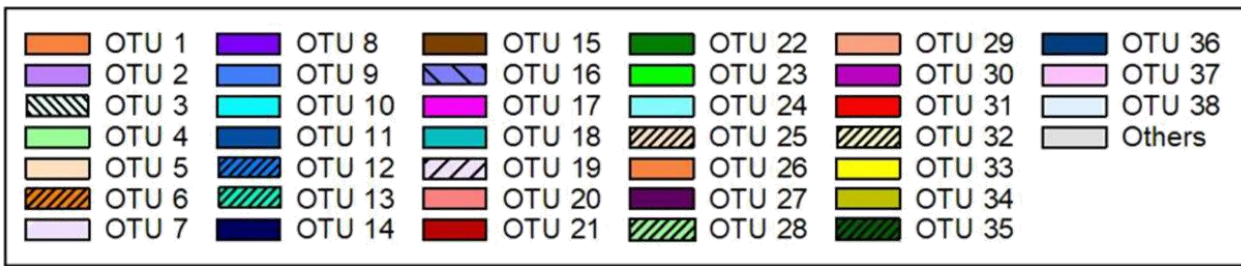

|        |                                                                                                                                                                                     |
|--------|-------------------------------------------------------------------------------------------------------------------------------------------------------------------------------------|
| OTU 1  | k__Bacteria; p__Proteobacteria; c__Gammaproteobacteria; o__Pseudomonadales; f__Moraxellaceae; g__Acinetobacter; s__Acinetobacter radioresistens DSM 6976 = NBRC 102413 = CIP 103788 |
| OTU 2  | k__Bacteria; p__Bacteroidetes; c__Flavobacteriia; o__Flavobacteriales; f__Flavobacteriaceae; g__Flaviramulus; s__marine bacterium J20-17                                            |
| OTU 3  | k__Bacteria; p__Proteobacteria; c__Alphaproteobacteria; o__Caulobacterales; f__Hyphomonadaceae; g__Robiginitomaculum; s__uncultured alpha proteobacterium                           |
| OTU 4  | k__Bacteria; p__Cyanobacteria; c__Cyanobacteria; o__SubsectionIII; f__FamilyI; g__Phormidium; s__uncultured bacterium                                                               |
| OTU 5  | k__Bacteria; p__Proteobacteria; c__Gammaproteobacteria; o__Oceanospirillales; f__Oceanospirillaceae; g__uncultured; s__uncultured bacterium                                         |
| OTU 6  | k__Bacteria; p__Proteobacteria; c__Gammaproteobacteria; o__Oceanospirillales; f__Oleiphilaceae; g__Oleiphilus; s__uncultured bacterium AD12-E7                                      |
| OTU 7  | k__Bacteria; p__Bacteroidetes; c__Flavobacteriia; o__Flavobacteriales; f__Flavobacteriaceae; g__Aquibacter; s__uncultured bacterium                                                 |
| OTU 8  | k__Bacteria; p__Bacteroidetes; c__Flavobacteriia; o__Flavobacteriales; f__Flavobacteriaceae; g__Mesoflavibacter; s__Mesoflavibacter sp. NBRC 110217                                 |
| OTU 9  | k__Bacteria; p__Proteobacteria; c__Alphaproteobacteria; o__Rhodobacterales; f__Rhodobacteraceae; g__Loktanela; s__uncultured alpha proteobacterium                                  |
| OTU 10 | k__Bacteria; p__Proteobacteria; c__Alphaproteobacteria; o__Sphingomonadales; f__Erythrobacteraceae; g__Erythrobacter; s__uncultured bacterium                                       |
| OTU 11 | k__Bacteria; p__Proteobacteria; c__Alphaproteobacteria; o__Rhizobiales; f__Phyllobacteriaceae; g__Pseudahrensia; s__uncultured marine bacterium                                     |
| OTU 12 | k__Bacteria; p__Proteobacteria; c__Alphaproteobacteria; o__Rhodobacterales; f__Rhodobacteraceae; g__Ruegeria; s__uncultured Ruegeria sp.                                            |
| OTU 13 | k__Bacteria; p__Proteobacteria; c__Alphaproteobacteria; o__Alphaproteobacteria Incertae Sedis; f__Unknown Family; g__uncultured; s__uncultured bacterium                            |
| OTU 14 | k__Bacteria; p__Proteobacteria; c__Alphaproteobacteria; o__Rhizobiales; f__Phyllobacteriaceae; g__Hoeflea; s__uncultured bacterium                                                  |
| OTU 15 | k__Bacteria; p__Proteobacteria; c__Gammaproteobacteria; o__Cellvibrionales; f__Cellvibrionaceae; g__Aestuariicella; s__Proteobacteria                                               |
| OTU 16 | k__Bacteria; p__Proteobacteria; c__Alphaproteobacteria; o__Caulobacterales; f__Hyphomonadaceae; g__uncultured; s__uncultured bacterium                                              |
| OTU 17 | k__Bacteria; p__Actinobacteria; c__Acidimicrobiia; o__Acidimicrobiales; f__OM1 clade; g__Candidatus Actinomarina; s__uncultured bacterium                                           |
| OTU 18 | k__Bacteria; p__Proteobacteria; c__Alphaproteobacteria; o__SAR11 clade; f__Surface 1; g__uncultured bacterium                                                                       |
| OTU 19 | k__Bacteria; p__Bacteroidetes; c__Flavobacteriia; o__Flavobacteriales; f__Flavobacteriaceae; g__Pseudofulvibacter;                                                                  |

|        |                                                                                                                                                          |
|--------|----------------------------------------------------------------------------------------------------------------------------------------------------------|
|        | s__Pseudovulvibacter geojedonensis                                                                                                                       |
| OTU 20 | k__Bacteria; p__Proteobacteria; c__Gammaproteobacteria; o__Arenicellales; f__Arenicellaceae; g__Arenicella;<br>s__uncultured proteobacterium             |
| OTU 21 | k__Bacteria; p__Proteobacteria; c__Gammaproteobacteria; o__Oceanospirillales; f__Oleiphilaceae; g__Oleiphilus;<br>s__Oleiphilus sp. HI0081               |
| OTU 22 | k__Bacteria; p__Cyanobacteria; c__Cyanobacteria; o__SubsectionI; f__FamilyI; g__Synechococcus; s__uncultured bacterium                                   |
| OTU 23 | k__Bacteria; p__Cyanobacteria; c__Chloroplast; o__uncultured cyanobacterium                                                                              |
| OTU 24 | k__Bacteria; p__Proteobacteria; c__Alphaproteobacteria; o__Rhizobiales; f__Rhodobiaceae; g__uncultured; s__uncultured<br>bacterium                       |
| OTU 25 | k__Bacteria; p__Proteobacteria; c__Gammaproteobacteria; o__Cellvibrionales; f__Cellvibrionaceae; g__Simiduia;<br>s__uncultured bacterium                 |
| OTU 26 | k__Bacteria; p__Proteobacteria; c__Gammaproteobacteria; o__Cellvibrionales; f__Cellvibrionaceae; g__uncultured;<br>s__uncultured bacterium               |
| OTU 27 | k__Bacteria; p__Bacteroidetes; c__Flavobacteriia; o__Flavobacteriales; f__Flavobacteriaceae; g__Tenacibaculum;<br>s__Tenacibaculum aiptasiae             |
| OTU 28 | k__Bacteria; p__Cyanobacteria; c__Chloroplast; o__uncultured bacterium                                                                                   |
| OTU 29 | k__Bacteria; p__Proteobacteria; c__Gammaproteobacteria; o__Oceanospirillales; f__Oceanospirillaceae; g__Spongiispira;<br>s__Spongiispira norvegica       |
| OTU 30 | k__Bacteria; p__Bacteroidetes; c__Flavobacteriia; o__Flavobacteriales; f__Flavobacteriaceae; g__Leptobacterium;<br>s__uncultured bacterium               |
| OTU 31 | k__Bacteria; p__Proteobacteria; c__Deltaproteobacteria; o__Myxococcales; f__Nannocystaceae; g__uncultured;<br>s__uncultured proteobacterium              |
| OTU 32 | k__Bacteria; p__Proteobacteria; c__Gammaproteobacteria; o__Oceanospirillales; f__Oleiphilaceae; g__Oleiphilus;<br>s__uncultured Oleiphilus sp.           |
| OTU 33 | k__Bacteria; p__Proteobacteria; c__Gammaproteobacteria; o__Oceanospirillales; f__SS1-B-06-26; g__uncultured bacterium                                    |
| OTU 34 | k__Bacteria; p__Proteobacteria; c__Gammaproteobacteria; o__Alteromonadales; f__Alteromonadaceae; g__Alteromonas;<br>s__uncultured bacterium              |
| OTU 35 | k__Bacteria; p__Cyanobacteria; c__Chloroplast; o__Virgulinema fragilis                                                                                   |
| OTU 36 | k__Bacteria; p__Proteobacteria; c__Alphaproteobacteria; o__Rhodobacterales; f__Rhodobacteraceae;<br>g__Pseudophaeobacter; s__Phaeobacter sp. 11ANDIMAR09 |
| OTU 37 | k__Bacteria; p__Bacteroidetes; c__Flavobacteriia; o__Flavobacteriales; f__Flavobacteriaceae; g__Polaribacter 4;<br>s__uncultured bacterium               |
| OTU 38 | k__Bacteria; p__Proteobacteria; c__Alphaproteobacteria; o__Sphin                                                                                         |
