# Supplementary material for: The composition of bacterial communities associated with plastic biofilms differs between different polymers and stages of biofilm succession
Source: PLoS One. 2019 Jun 5;14(6):e0217165. doi: 10.1371/journal.pone.0217165 (PMC6550384; doi:10.1371/journal.pone.0217165)
Supplement: S3 File — SEM images of: (A) glass, (B) PP, (C) HDPE, (D) LDPE, (E) PVC DINP and (F) PVC DEHP incubated under both ambient and dim light conditions for one week, one month and two months. The PVC DEHP sample for SEM analysis was lost during the incubation. Magnification is 450x. (PDF) [file pone.0217165.s003.pdf]

(A) Glass

|                  | Ambient light | Dim light |
|------------------|---------------|-----------|
| After one week   |               |           |
| After one month  |               |           |
| After two months |               |           |

(B) LDPE

|                  | Ambient light                                                                       | Dim light                                                                            |
|------------------|-------------------------------------------------------------------------------------|--------------------------------------------------------------------------------------|
| After one week   | 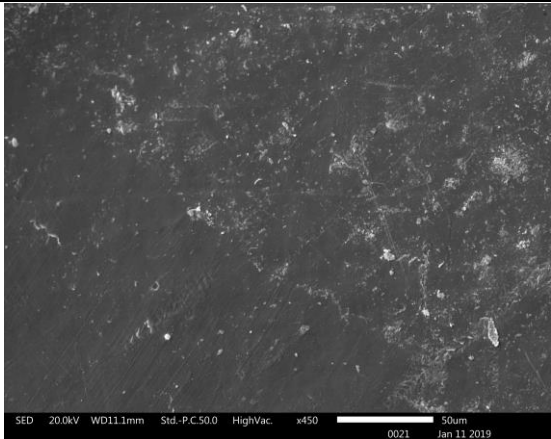   | 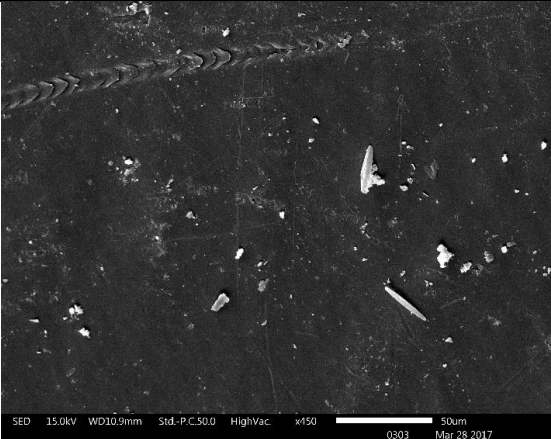   |
| After one month  | 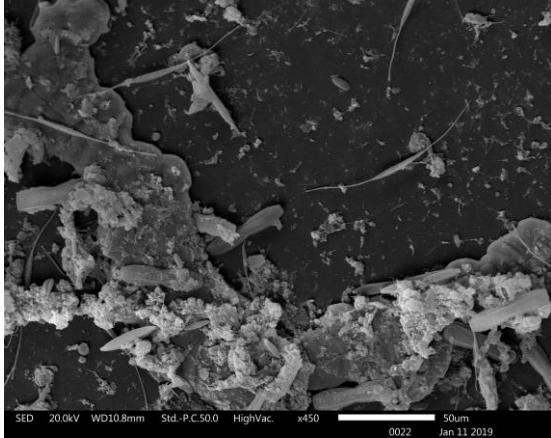  | 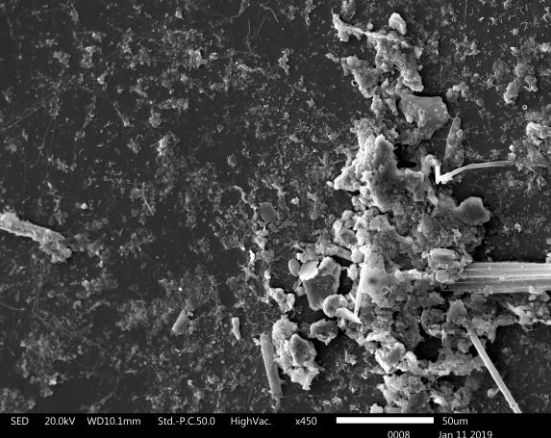  |
| After two months | 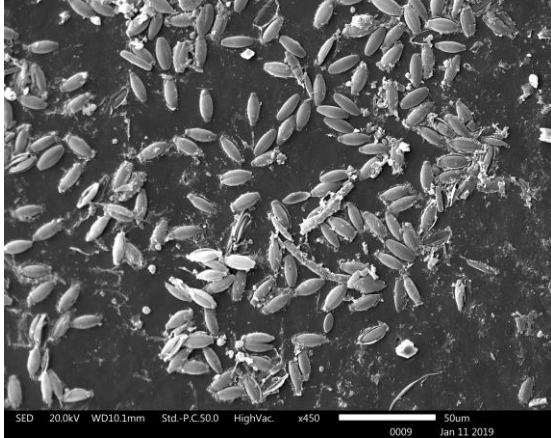 | 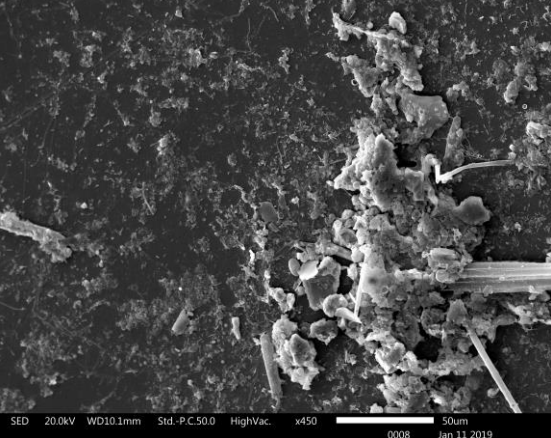 |

(C) HDPE

|                  | Ambient light | Dim light |
|------------------|---------------|-----------|
| After one week   |               |           |
| After one month  |               |           |
| After two months |               |           |

(D) PP

|                  | Ambient light | Dim light |
|------------------|---------------|-----------|
| After one week   |               |           |
| After one month  |               |           |
| After two months |               |           |

(E) PVC DEHP

|                  | Ambient light                                                                       | Dim light                                                                            |
|------------------|-------------------------------------------------------------------------------------|--------------------------------------------------------------------------------------|
| After one week   | 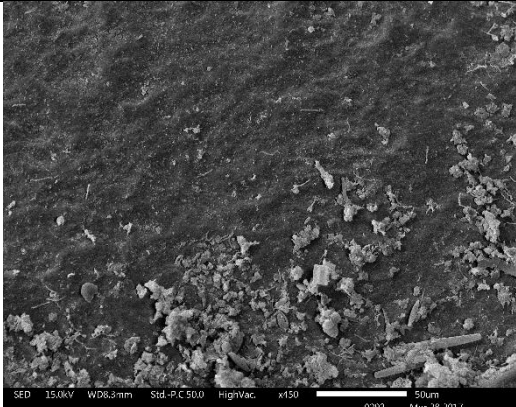   | 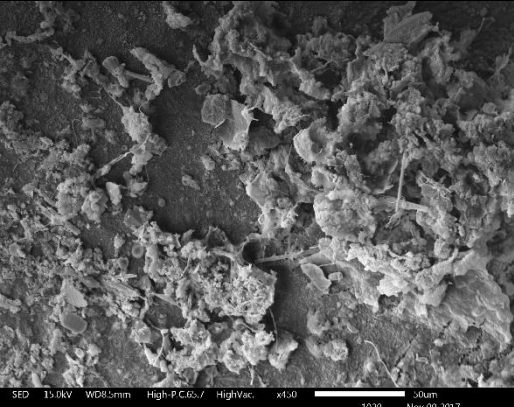   |
| After one month  | 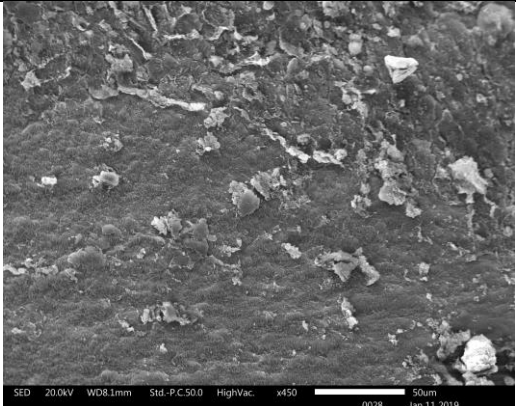  | 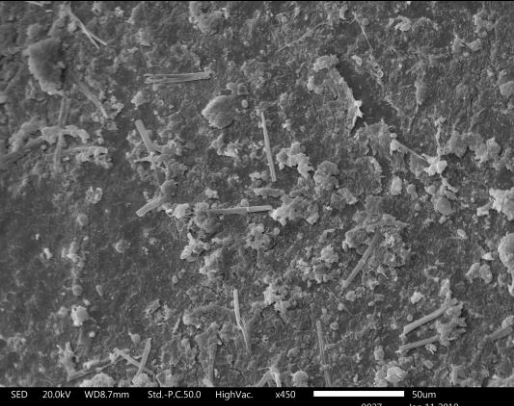  |
| After two months | 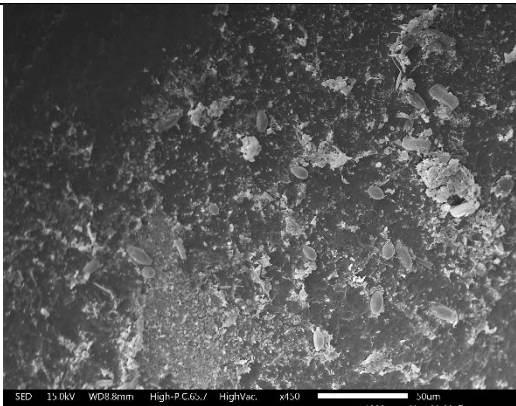 | 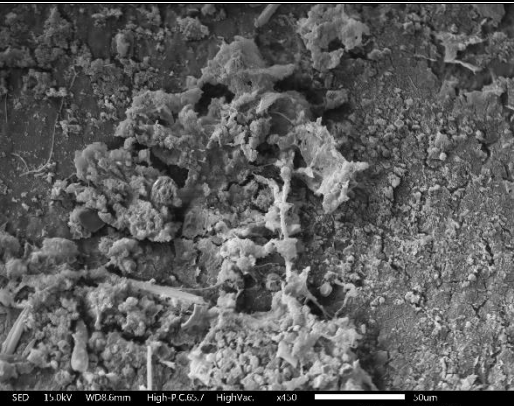 |

(F) PVC DEHP

|                  | Ambient light | Dim light |
|------------------|---------------|-----------|
| After one week   |               |           |
| After one month  |               |           |
| After two months |               |           |
